# Supplementary material
Source: ML conference proceedings conference paper supplement (https://openreview.net/forum?id=ZK1LoTo10R)
Supplement: supplementary_material [file attachment]

540 **Reproducibility Statement.** We provide experimental details regarding the datasets, baselines,  
541 evaluation metrics, and implementation in Sec. 4. Additional details on the dataset are provided  
542 in Appendix B. In Appendix C, we provide additional details about the baselines, the implementation  
543 of our method, and the computation resources used.

## 544 REFERENCES

545  
546  
547 Shahira Abousamra, Minh Hoai, Dimitris Samaras, and Chao Chen. Localization in the crowd  
548 with topological constraints. In *Proceedings of the AAAI Conference on Artificial Intelligence*,  
549 volume 35, pp. 872–881, 2021.

550  
551 Josh Achiam, Steven Adler, Sandhini Agarwal, Lama Ahmad, Ilge Akkaya, Florencia Leoni Ale-  
552 man, Diogo Almeida, Janko Altenschmidt, Sam Altman, Shyamal Anadkat, et al. Gpt-4 technical  
553 report. *arXiv preprint arXiv:2303.08774*, 2023.

554  
555 Omri Avrahami, Dani Lischinski, and Ohad Fried. Blended diffusion for text-driven editing of  
556 natural images. In *Proceedings of the IEEE/CVF Conference on Computer Vision and Pattern  
Recognition*, pp. 18208–18218, 2022.

557  
558 Samik Banerjee, Lucas Magee, Dingkan Wang, Xu Li, Bing-Xing Huo, Jaikishan Jayakumar,  
559 Katherine Matho, Meng-Kuan Lin, Keerthi Ram, Mohanasankar Sivaprakasam, et al. Sema-  
560 ntic segmentation of microscopic neuroanatomical data by combining topological priors with  
561 encoder–decoder deep networks. *Nature machine intelligence*, 2(10):585–594, 2020.

562  
563 Omer Bar-Tal, Lior Yariv, Yaron Lipman, and Tali Dekel. Multidiffusion: Fusing diffusion paths for  
controlled image generation. 2023.

564  
565 Dina Bashkirova, José Lezama, Kihyuk Sohn, Kate Saenko, and Irfan Essa. Masksketch: Unpaired  
566 structure-guided masked image generation. In *Proceedings of the IEEE/CVF Conference on Com-  
puter Vision and Pattern Recognition*, pp. 1879–1889, 2023.

567  
568 Rickard Brüel-Gabrielsson, Bradley J Nelson, Anjan Dwaraknath, Primož Skraba, Leonidas J  
569 Guibas, and Gunnar Carlsson. A topology layer for machine learning. *arXiv preprint  
arXiv:1905.12200*, 2019.

570  
571 Nick Byrne, James R Clough, Israel Valverde, Giovanni Montana, and Andrew P King. A persistent  
572 homology-based topological loss for cnn-based multiclass segmentation of cmr. *IEEE transac-  
573 tions on medical imaging*, 42(1):3–14, 2022.

574  
575 Holger Caesar, Jasper Uijlings, and Vittorio Ferrari. Coco-stuff: Thing and stuff classes in context.  
576 In *Proceedings of the IEEE conference on computer vision and pattern recognition*, pp. 1209–  
577 1218, 2018.

578  
579 Gunnar Carlsson. Topology and data. *Bulletin of the American Mathematical Society*, 46(2):255–  
308, 2009.

580  
581 Chao Chen, Xiuyan Ni, Qinxun Bai, and Yusu Wang. A topological regularizer for classifiers via  
582 persistent homology. In *The 22nd International Conference on Artificial Intelligence and Statis-  
583 tics*, pp. 2573–2582. PMLR, 2019.

584  
585 Minghao Chen, Iro Laina, and Andrea Vedaldi. Training-free layout control with cross-attention  
586 guidance. In *Proceedings of the IEEE/CVF Winter Conference on Applications of Computer  
Vision*, pp. 5343–5353, 2024.

587  
588 James R Clough, Ilkay Oksuz, Nicholas Byrne, Julia A Schnabel, and Andrew P King. Explicit  
589 topological priors for deep-learning based image segmentation using persistent homology. In  
590 *International Conference on Information Processing in Medical Imaging*, pp. 16–28. Springer,  
591 2019.

592  
593 James R Clough, Nicholas Byrne, Ilkay Oksuz, Veronika A Zimmer, Julia A Schnabel, and An-  
drew P King. A topological loss function for deep-learning based image segmentation using  
persistent homology. *TPAMI*, 2020.

- 594 Tamal K Dey, Jiayuan Wang, and Yusu Wang. Road network reconstruction from satellite im-  
595 ages with machine learning supported by topological methods. In *Proceedings of the 27th ACM*  
596 *SIGSPATIAL International Conference on Advances in Geographic Information Systems*, pp.  
597 520–523, 2019.
- 598 Prafulla Dhariwal and Alexander Nichol. Diffusion models beat gans on image synthesis. *Advances*  
599 *in neural information processing systems*, 34:8780–8794, 2021.
- 600
- 601 Shiyi Du, Qicheng Lao, Qingbo Kang, Yiyue Li, Zekun Jiang, Yanfeng Zhao, and Kang Li. Distill-  
602 ing knowledge from topological representations for pathological complete response prediction.  
603 In *International Conference on Medical Image Computing and Computer-Assisted Intervention*,  
604 pp. 56–65. Springer, 2022.
- 605 Edelsbrunner, Letscher, and Zomorodian. Topological persistence and simplification. *Discrete &*  
606 *Computational Geometry*, 28:511–533, 2002.
- 607
- 608 Herbert Edelsbrunner and John Harer. *Computational Topology: An Introduction*. American Math-  
609 ematical Soc., 2010.
- 610 Azade Farshad, Yousef Yeganeh, Yu Chi, Chengzhi Shen, Böjrn Ommer, and Nassir Navab. Scene-  
611 genie: Scene graph guided diffusion models for image synthesis. In *Proceedings of the IEEE/CVF*  
612 *International Conference on Computer Vision (ICCV) Workshops*, pp. 88–98, 2023.
- 613
- 614 J Funke, S Saalfeld, DD Bock, SC Turaga, and E Perlman. Miccai challenge on circuit reconstruction  
615 from electron microscopy images, 2016.
- 616 Ian Goodfellow, Jean Pouget-Abadie, Mehdi Mirza, Bing Xu, David Warde-Farley, Sherjil Ozair,  
617 Aaron Courville, and Yoshua Bengio. Generative adversarial nets. *Advances in neural information*  
618 *processing systems*, 27, 2014.
- 619
- 620 Saumya Gupta, Xiaoling Hu, James Kaan, Michael Jin, Mutshipay Mpoy, Katherine Chung, Gagan-  
621 deep Singh, Mary Saltz, Tahsin Kurc, Joel Saltz, et al. Learning topological interactions for  
622 multi-class medical image segmentation. In *ECCV*, 2022.
- 623 Saumya Gupta, Yikai Zhang, Xiaoling Hu, Prateek Prasanna, and Chao Chen. Topology-aware  
624 uncertainty for image segmentation. *Advances in Neural Information Processing Systems*, 36,  
625 2024.
- 626
- 627 Tiankai Hang, Shuyang Gu, Chen Li, Jianmin Bao, Dong Chen, Han Hu, Xin Geng, and  
628 Baining Guo. Efficient diffusion training via min-snr weighting strategy. *arXiv preprint*  
629 *arXiv:2303.09556*, 2023.
- 630 Hongliang He, Jun Wang, Pengxu Wei, Fan Xu, Xiangyang Ji, Chang Liu, and Jie Chen. Toposeg:  
631 Topology-aware nuclear instance segmentation. In *Proceedings of the IEEE/CVF International*  
632 *Conference on Computer Vision*, pp. 21307–21316, 2023.
- 633
- 634 Martin Heusel, Hubert Ramsauer, Thomas Unterthiner, Bernhard Nessler, and Sepp Hochreiter.  
635 Gans trained by a two time-scale update rule converge to a local nash equilibrium. *Advances in*  
636 *neural information processing systems*, 30, 2017.
- 637 Jonathan Ho and Tim Salimans. Classifier-free diffusion guidance. *arXiv preprint*  
638 *arXiv:2207.12598*, 2022.
- 639
- 640 Jonathan Ho, Ajay Jain, and Pieter Abbeel. Denoising diffusion probabilistic models. *Advances in*  
641 *neural information processing systems*, 33:6840–6851, 2020.
- 642 Christoph Hofer, Roland Kwitt, Marc Niethammer, and Andreas Uhl. Deep learning with topologi-  
643 cal signatures. *Advances in neural information processing systems*, 30, 2017.
- 644 Xiaoling Hu, Fuxin Li, Dimitris Samaras, and Chao Chen. Topology-preserving deep image seg-  
645 mentation. In *NeurIPS*, 2019.
- 646
- 647 Xiaoling Hu, Yusu Wang, Li Fuxin, Dimitris Samaras, and Chao Chen. Topology-aware segmenta-  
tion using discrete morse theory. In *ICLR*, 2021.

- 648 Xiaoling Hu, Dimitris Samaras, and Chao Chen. Learning probabilistic topological representations  
649 using discrete morse theory. In *ICLR*, 2023.
- 650
- 651 Lianghua Huang, Di Chen, Yu Liu, Yujun Shen, Deli Zhao, and Jingren Zhou. Composer: Creative  
652 and controllable image synthesis with composable conditions. *arXiv preprint arXiv:2302.09778*,  
653 2023.
- 654 Phillip Isola, Jun-Yan Zhu, Tinghui Zhou, and Alexei A Efros. Image-to-image translation with  
655 conditional adversarial networks. In *Proceedings of the IEEE conference on computer vision and  
656 pattern recognition*, pp. 1125–1134, 2017.
- 657 Shizuo Kaji, Takeki Sudo, and Kazushi Ahara. Cubical ripser: Software for computing persistent  
658 homology of image and volume data. *arXiv preprint arXiv:2005.12692*, 2020.
- 659
- 660 Valentin Khruikov and Ivan Oseledets. Geometry score: A method for comparing generative ad-  
661 versarial networks. In *International conference on machine learning*, pp. 2621–2629. PMLR,  
662 2018.
- 663 Gwanghyun Kim, Taesung Kwon, and Jong Chul Ye. Diffusionclip: Text-guided diffusion models  
664 for robust image manipulation. In *Proceedings of the IEEE/CVF Conference on Computer Vision  
665 and Pattern Recognition*, pp. 2426–2435, 2022.
- 666
- 667 Yuheng Li, Haotian Liu, Qingyang Wu, Fangzhou Mu, Jianwei Yang, Jianfeng Gao, Chunyuan Li,  
668 and Yong Jae Lee. Gligen: Open-set grounded text-to-image generation. In *Proceedings of the  
669 IEEE/CVF Conference on Computer Vision and Pattern Recognition*, pp. 22511–22521, 2023.
- 670 Maneesh Agrawala Lvmin Zhang. Controlnet-seg model. ControlNet-Seg model card, <https://huggingface.co/lllyasviel/sd-controlnet-seg>. 2023.
- 671
- 672 Inc Midjourney. Midjourney. <https://www.midjourney.com/>. 2024.
- 673
- 674 Chong Mou, Xintao Wang, Liangbin Xie, Yanze Wu, Jian Zhang, Zhongang Qi, Ying Shan, and  
675 Xiaohu Qie. T2i-adapter: Learning adapters to dig out more controllable ability for text-to-image  
676 diffusion models. *arXiv preprint arXiv:2302.08453*, 2023.
- 677
- 678 James R Munkres. *Elements of algebraic topology*. CRC press, 2018.
- 679
- 680 Xiuyan Ni, Novi Quadrianto, Yusu Wang, and Chao Chen. Composing tree graphical models with  
681 persistent homology features for clustering mixed-type data. In *International Conference on  
682 Machine Learning*, pp. 2622–2631. PMLR, 2017.
- 683 Alex Nichol, Prafulla Dhariwal, Aditya Ramesh, Pranav Shyam, Pamela Mishkin, Bob McGrew,  
684 Ilya Sutskever, and Mark Chen. Glide: Towards photorealistic image generation and editing with  
685 text-guided diffusion models. *arXiv preprint arXiv:2112.10741*, 2021.
- 686 Alexander Quinn Nichol and Prafulla Dhariwal. Improved denoising diffusion probabilistic models.  
687 In *International Conference on Machine Learning*, pp. 8162–8171. PMLR, 2021.
- 688
- 689 OpenAI. Dall-e 3. <https://openai.com/product/dall-e-3>, a. 2023.
- 690
- 691 OpenAI. Lsun bedroom model. [https://openaipublic.blob.core.windows.net/  
692 diffusion/march-2021/lsun\\_uncond\\_100M\\_2400K\\_bs64.pt](https://openaipublic.blob.core.windows.net/diffusion/march-2021/lsun_uncond_100M_2400K_bs64.pt), b. 2021.
- 693
- 694 Roni Paiss, Ariel Ephrat, Omer Tov, Shiran Zada, Inbar Mosseri, Michal Irani, and Tali Dekel.  
695 Teaching clip to count to ten. In *Proceedings of the IEEE/CVF International Conference on  
696 Computer Vision*, pp. 3170–3180, 2023.
- 697
- 698 Yaopeng Peng, Hongxiao Wang, Milan Sonka, and Danny Z Chen. Phg-net: Persistent homology  
699 guided medical image classification. In *Proceedings of the IEEE/CVF Winter Conference on  
700 Applications of Computer Vision*, pp. 7583–7592, 2024.
- 701
- 702 Quynh Phung, Songwei Ge, and Jia-Bin Huang. Grounded text-to-image synthesis with attention  
703 refocusing. In *Proceedings of the IEEE/CVF Conference on Computer Vision and Pattern Recog-  
704 nition*, pp. 7932–7942, 2024.

- 702 Can Qin, Shu Zhang, Ning Yu, Yihao Feng, Xinyi Yang, Yingbo Zhou, Huan Wang, Juan Car-  
703 los Niebles, Caiming Xiong, Silvio Savarese, et al. Unicontrol: A unified diffusion model for  
704 controllable visual generation in the wild. *arXiv preprint arXiv:2305.11147*, 2023.
- 705 Alec Radford, Jong Wook Kim, Chris Hallacy, Aditya Ramesh, Gabriel Goh, Sandhini Agarwal,  
706 Girish Sastry, Amanda Askell, Pamela Mishkin, Jack Clark, et al. Learning transferable visual  
707 models from natural language supervision. In *International conference on machine learning*, pp.  
708 8748–8763. PMLR, 2021.
- 709 Aditya Ramesh, Mikhail Pavlov, Gabriel Goh, Scott Gray, Chelsea Voss, Alec Radford, Mark Chen,  
710 and Ilya Sutskever. Zero-shot text-to-image generation. In *International Conference on Machine*  
711 *Learning*, pp. 8821–8831. PMLR, 2021.
- 712 Robin Rombach, Andreas Blattmann, Dominik Lorenz, Patrick Esser, and Björn Ommer. High-  
713 resolution image synthesis with latent diffusion models. In *Proceedings of the IEEE/CVF confer-*  
714 *ence on computer vision and pattern recognition*, pp. 10684–10695, 2022.
- 715 Olaf Ronneberger, Philipp Fischer, and Thomas Brox. U-net: Convolutional networks for biomed-  
716 ical image segmentation. In *Medical Image Computing and Computer-Assisted Intervention-*  
717 *MICCAI 2015: 18th International Conference, Munich, Germany, October 5-9, 2015, Proceed-*  
718 *ings, Part III 18*, pp. 234–241. Springer, 2015.
- 719 Nataniel Ruiz, Yuanzhen Li, Varun Jampani, Yael Pritch, Michael Rubinstein, and Kfir Aberman.  
720 Dreambooth: Fine tuning text-to-image diffusion models for subject-driven generation. In *Pro-*  
721 *ceedings of the IEEE/CVF Conference on Computer Vision and Pattern Recognition*, pp. 22500–  
722 22510, 2023.
- 723 Runway. Stability ai. Stable diffusion v1.5 model card, [https://huggingface.co/](https://huggingface.co/runwayml/stable-diffusion-v1-5)  
724 [runwayml/stable-diffusion-v1-5](https://huggingface.co/runwayml/stable-diffusion-v1-5). 2022.
- 725 Chitwan Saharia, William Chan, Saurabh Saxena, Lala Li, Jay Whang, Emily Denton, Seyed Kam-  
726 yar Seyed Ghasemipour, Burcu Karagol Ayan, S Sara Mahdavi, Rapha Gontijo Lopes, et al. Pho-  
727 torealistic text-to-image diffusion models with deep language understanding. *URL https://arxiv.*  
728 *org/abs/2205.11487*, 4, 2022a.
- 729 Chitwan Saharia, William Chan, Saurabh Saxena, Lala Li, Jay Whang, Emily L Denton, Kamyar  
730 Ghasemipour, Raphael Gontijo Lopes, Burcu Karagol Ayan, Tim Salimans, et al. Photorealistic  
731 text-to-image diffusion models with deep language understanding. *Advances in neural informa-*  
732 *tion processing systems*, 35:36479–36494, 2022b.
- 733 Axel Sauer, Dominik Lorenz, Andreas Blattmann, and Robin Rombach. Adversarial diffusion dis-  
734 tillation. In *European Conference on Computer Vision*, pp. 87–103. Springer, 2025.
- 735 Suprosanna Shit, Johannes C Paetzold, Anjany Sekuboyina, Ivan Ezhov, Alexander Unger, Andrey  
736 Zhylka, Josien PW Pluim, Ulrich Bauer, and Bjoern H Menze. cldice-a novel topology-preserving  
737 loss function for tubular structure segmentation. In *CVPR*, 2021.
- 738 Jascha Sohl-Dickstein, Eric Weiss, Niru Maheswaranathan, and Surya Ganguli. Deep unsupervised  
739 learning using nonequilibrium thermodynamics. In *International conference on machine learn-*  
740 *ing*, pp. 2256–2265. PMLR, 2015.
- 741 Kihyuk Sohn, Honglak Lee, and Xinchen Yan. Learning structured output representation using deep  
742 conditional generative models. *Advances in neural information processing systems*, 28, 2015.
- 743 Jiaming Song, Chenlin Meng, and Stefano Ermon. Denoising diffusion implicit models. *arXiv*  
744 *preprint arXiv:2010.02502*, 2020a.
- 745 Yang Song and Stefano Ermon. Generative modeling by estimating gradients of the data distribution.  
746 *Advances in neural information processing systems*, 32, 2019.
- 747 Yang Song, Jascha Sohl-Dickstein, Diederik P Kingma, Abhishek Kumar, Stefano Ermon, and Ben  
748 Poole. Score-based generative modeling through stochastic differential equations. *arXiv preprint*  
749 *arXiv:2011.13456*, 2020b.

756 Nico Stucki, Johannes C Paetzold, Suprosanna Shit, Bjoern Menze, and Ulrich Bauer. Topologically  
757 faithful image segmentation via induced matching of persistence barcodes. In *ICML*, 2023.  
758  
759 Student. The probable error of a mean. *Biometrika*, 6(1):1–25, 1908.  
760  
761 Robert Endre Tarjan. Efficiency of a good but not linear set union algorithm. *Journal of the ACM*  
762 (*JACM*), 22(2):215–225, 1975.  
763  
764 Ashish Vaswani, Noam Shazeer, Niki Parmar, Jakob Uszkoreit, Llion Jones, Aidan N Gomez,  
765 Łukasz Kaiser, and Illia Polosukhin. Attention is all you need. *Advances in neural informa-*  
766 *tion processing systems*, 30, 2017.  
767  
768 Fan Wang, Huidong Liu, Dimitris Samaras, and Chao Chen. Topogan: A topology-aware generative  
769 adversarial network. In *Computer Vision–ECCV 2020: 16th European Conference, Glasgow, UK,*  
770 *August 23–28, 2020, Proceedings, Part III 16*, pp. 118–136. Springer, 2020.  
771  
772 Fan Wang, Saarthak Kapse, Steven Liu, Prateek Prasanna, and Chao Chen. Topotxr: a topological  
773 biomarker for predicting treatment response in breast cancer. In *International Conference on*  
774 *Information Processing in Medical Imaging*, pp. 386–397. Springer, 2021.  
775  
776 Haotian Wang, Min Xian, and Aleksandar Vakanski. Ta-net: Topology-aware network for gland  
777 segmentation. In *WACV*, 2022a.  
778  
779 Tengfei Wang, Ting Zhang, Bo Zhang, Hao Ouyang, Dong Chen, Qifeng Chen, and Fang Wen.  
780 Pretraining is all you need for image-to-image translation. *arXiv preprint arXiv:2205.12952*,  
781 2022b.  
782  
783 Lvmin Zhang, Anyi Rao, and Maneesh Agrawala. Adding conditional control to text-to-image  
784 diffusion models. In *Proceedings of the IEEE/CVF International Conference on Computer Vision*,  
785 pp. 3836–3847, 2023.  
786  
787 Shihao Zhao, Dongdong Chen, Yen-Chun Chen, Jianmin Bao, Shaozhe Hao, Lu Yuan, and Kwan-  
788 Yee K Wong. Uni-controlnet: All-in-one control to text-to-image diffusion models. *Advances in*  
789 *Neural Information Processing Systems*, 36, 2024.  
790  
791  
792  
793  
794  
795  
796  
797  
798  
799  
800  
801  
802  
803  
804  
805  
806  
807  
808  
809

810 The appendix is organized as follows.  
 811 Appendix A provides the illustration of super-level sets for 1-dim topology.  
 812 Appendix B provides additional details of the datasets.  
 813 Appendix C provides additional baseline and implementation details.  
 814 Appendix D contains 0-dim constraint-wise results on the COCO dataset.  
 815 Appendix E provides qualitative results of Stable Diffusion (Rombach et al., 2022; Runway),  
 816 DALL-E 3 (OpenAI, a), and AR (Phung et al., 2024) for 1-dim topological constraints.  
 817 Appendix F presents experiments on 1-dim topology where there are non-boundary (standalone)  
 818 holes.  
 819 Appendix G includes an ablation study on the ‘Encoding Network’ for the topological constraint  $c$ .  
 820 Appendix H provides a discussion on the limitations of our method.

825 **A PERSISTENT HOMOLOGY**

826 From Sec. 3.2, the equivalent of Fig. 4 for 1-dimensional topology is shown in Fig. 9.

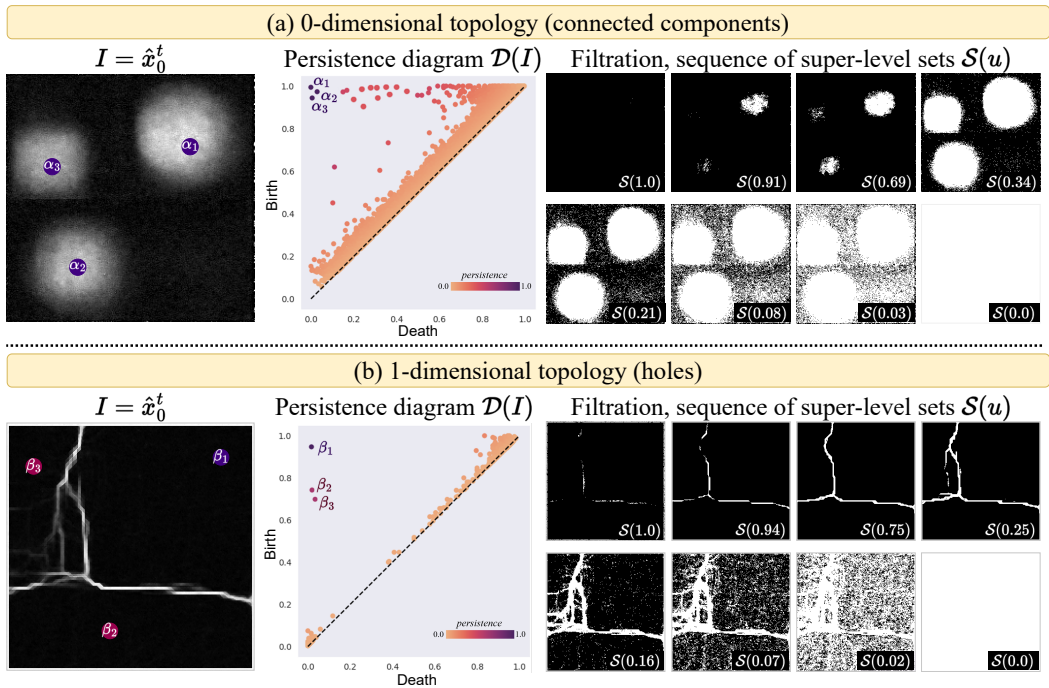

852 Figure 9: Illustration of persistent homology and persistence diagrams of both types of topological  
 853 structures, 0-dim connected components and 1-dim holes. (a) Despite the noise, we can visually see  
 854 three prominent structures  $\alpha_1, \alpha_2, \alpha_3$  in  $I$ . In the topological space,  $\alpha_1, \alpha_2, \alpha_3$  thus appear in  
 855 the top-left corner of the persistence diagram  $\mathcal{D}(I)$ , persisting through most of the filtration  $\mathcal{S}$ . Similarly  
 856 in (b),  $\beta_1, \beta_2, \beta_3$  denote the prominent holes. All the remaining connected components and holes  
 857 are noisy, persisting over a short threshold in  $\mathcal{S}$ , thus appearing closer to the diagonal in  $\mathcal{D}(I)$ .  
 858 Persistence diagrams are useful to distinguish between salient and noisy structures in an image.

860 **B DATASET DETAILS**

861 We provide the number of images per topological constraint  $c$  used for training on each dataset  
 862 in Tab. 5. For COCO (Caesar et al., 2018), since we also consider the animal class, each animal is

Table 5: Dataset composition

| Dataset        | Topological Constraint (Betti Number) |      |      |      |      |      |     |      |      |     |
|----------------|---------------------------------------|------|------|------|------|------|-----|------|------|-----|
|                | 1                                     | 2    | 3    | 4    | 5    | 6    | 7   | 8    | 9    | 10  |
| Shapes         | 2K                                    | 2K   | 2K   | 2K   | 2K   | 2K   | 2K  | 2K   | 2K   | 2K  |
| COCO (Animals) | 520                                   | 517  | 503  | 297  | 176  | 85   | 64  | 38   | 30   | 27  |
| Google Maps    | 549                                   | 669  | 1099 | 1220 | 1343 | 1806 | 602 | 1470 | 1054 | 662 |
| CREMI          | 2160                                  | 1992 | 3726 | 3505 | 1644 | 580  | 187 | 207  | 170  | 112 |

distributed unequally across the different constraint values. For example, there were more images for ‘birds’ having  $c = 10$  than compared to, say, ‘elephant.’ All the 10 animal classes are present in the dataset; they are bear, bird, cat, cow, dog, elephant, giraffe, horse, sheep, and zebra.

When curating the dataset for CREMI (Funke et al., 2016) and Google Maps (Isola et al., 2017), we manually added a (white) border to all the images. By definition of 1-dim topology, a hole is completely surrounded by a boundary. Hence, we needed to add a border to obtain the correct number of holes/regions.

## C IMPLEMENTATION DETAILS

All ADM-T and TDN experiments were conducted on 1 NVIDIA RTX A6000 GPU, with a batch size of 16 and a learning rate of  $2 \times 10^{-5}$ . As mentioned in Sec. 3.3, our diffusion model is parameterized to predict in noise space, and we use Eq. (2) to get an estimate of the noiseless image. Although diffusion models can be parameterized to predict the noiseless state directly, we find from existing works (Hang et al., 2023; Wang et al., 2022b) that their performance is poorer compared to predicting the noise. Hence we stick to the configuration of predicting the noise. This also allows us to load pretrained weights from OpenAI (b) for our experiments instead of training from scratch.

For training ADM-T and TDN, we use the PyTorch codebase from Dhariwal & Nichol (2021)<sup>4</sup> and use the LSUN Bedrooms pretrained model checkpoint (OpenAI, b) to fine-tune from. To compute the birth death pairs of each topological structure, we use the Cubical Ripser (Kaji et al., 2020) library. We will publicly release the code upon acceptance of the paper.

In Fig. 1, Fig. 6, Fig. 7, Fig. 11, and Fig. 12, the Stable Diffusion (Rombach et al., 2022) results are generated using the Diffusers<sup>5</sup> library with pretrained checkpoint from Runway. For DALL-E 3, we generate images using the OpenAI API<sup>6</sup>. For Attention Refocusing (AR) (Phung et al., 2024), we use their publicly available codebase<sup>7</sup> alongwith GPT-4 (Achiam et al., 2023) from the OpenAI API to generate the layout maps. For rendering images from masks via ControlNet (Zhang et al., 2023), we use the Diffusers library with pretrained checkpoint from Lvmin Zhang. For Fig. 7, however, we fine-tune ControlNet on the CREMI dataset (Funke et al., 2016) so as to generate appropriate results for the corresponding text prompt.

## D CONSTRAINT-WISE RESULTS

In Fig. 10, we plot the accuracy of the different methods on the COCO dataset. For smaller object counts, that is,  $c \leq 5$ , the performance of each method is better than  $c > 5$ . At higher object counts, although the accuracy of each method reduces, TDN still significantly outperforms the baselines.

## E ADDITIONAL 1-DIM QUALITATIVE RESULTS

In Fig. 11, we show qualitative results of pretrained Stable Diffusion (Rombach et al., 2022), DALL-E 3 (OpenAI, a) and Attention Refocusing (AR) (Phung et al., 2024) for the same 1-dim constraints shown in Fig. 7 of the main paper. As 1-dim topology is hard to describe in words, we tried a lot of variations for the text prompts, and show the results from the best ones in the figure.

<sup>4</sup><https://github.com/openai/guided-diffusion>

<sup>5</sup><https://huggingface.co/docs/diffusers/en/index>

<sup>6</sup><https://platform.openai.com/docs/api-reference/introduction>

<sup>7</sup><https://github.com/Attention-Refocusing/attention-refocusing>

918  
919  
920  
921  
922  
923  
924  
925  
926  
927  
928  
929  
930  
931  
932  
933  
934  
935  
936  
937  
938  
939  
940  
941  
942  
943  
944  
945  
946  
947  
948  
949  
950  
951  
952  
953  
954  
955  
956  
957  
958  
959  
960  
961  
962  
963  
964  
965  
966  
967  
968  
969  
970  
971

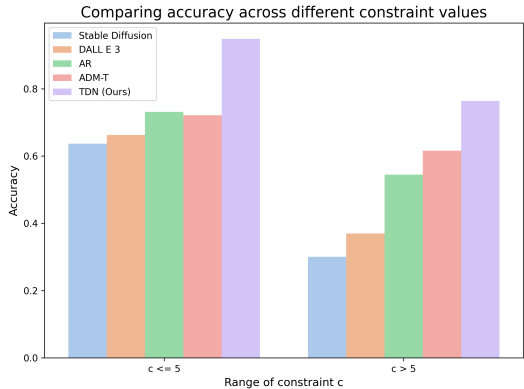

Figure 10: Accuracy results on low and high object counts (COCO dataset).

As the pretrained Stable Diffusion, DALL-E 3, and AR are not trained on Electron Microscopy images of cell neurons, their inaccurate results are understandable. For generating roads, however, these methods do generate visually appropriate images but struggle to maintain the correct number of holes/regions. AR additionally tends to generate images that appear to be divided into separate, unconnected sections. This is due to the use of layout maps in the reverse process. All these methods are limited to generating images with 0-dim topology (i.e., distinct objects), and do not extend to 1-dim topology. This shortcoming motivates our work on TopoDiffusionNet.

## F ADDITIONAL EXPERIMENTS ON HOLES

In the main paper, we show experiments on 1-dim topology using the CREMI (Funke et al., 2016), and Google Maps (Isola et al., 2017) datasets. In these datasets, it makes sense that the holes are with respect to the image frame/boundary and span the whole image. However, TDN can handle 1-dim holes in general, not just those with respect to the boundary. To demonstrate this, we conduct experiments on standalone holes (not relative to the boundary), and present the results in Tab. 6 and Fig. 12. We generate a synthetic dataset of circular rings (similar to the Shapes dataset) to train TDN, and use the prompt ‘donuts’ in ControlNet to render the image. While generating  $c$  donuts could also be achieved using the 0-dim topological constraint, this experiment highlights the 1-dim generalizability of TDN.

Table 6: Standalone holes

| Method     | Accuracy $\uparrow$ | F1 $\uparrow$   |
|------------|---------------------|-----------------|
| ADM-T      | $0.79 \pm 0.12$     | $0.81 \pm 0.11$ |
| TDN (Ours) | $0.95 \pm 0.03$     | $0.96 \pm 0.02$ |

## G ADDITIONAL ABLATION STUDY

We conduct an additional ablation study apart from the ones presented in the main paper.

**Ablation study of the encoding network.** In TDN, we use the topological constraint  $c$  as a condition. We do this by first obtaining an embedding of  $c$  via an Encoding Network (Fig. 3), and then passing it to all the residual blocks in the denoising model.

In the results reported in the main paper, the Encoding Network is composed of a few linear layers. We use ‘LL’ to denote this configuration.

Another way to configure the Encoding Network is to use the Transformer sinusoidal position embedding (Vaswani et al., 2017). Let ‘PE’ denote this configuration. It uses the same code as the network generating the sinusoidal timestep embedding.

We show results comparing LL and PE in Tab. 7 when using our proposed objective function  $\mathcal{L}_{\text{top}}$ . We find that both configurations have comparable performance, with LL slightly outperforming PE.



972  
973  
974  
975  
976  
977  
978  
979  
980  
981  
982  
983  
984  
985  
986  
987  
988  
989  
990  
991  
992  
993  
994  
995  
996  
997  
998  
999  
1000  
1001  
1002  
1003  
1004  
1005  
1006  
1007  
1008  
1009  
1010  
1011  
1012  
1013  
1014  
1015  
1016  
1017  
1018  
1019  
1020  
1021  
1022  
1023  
1024  
1025

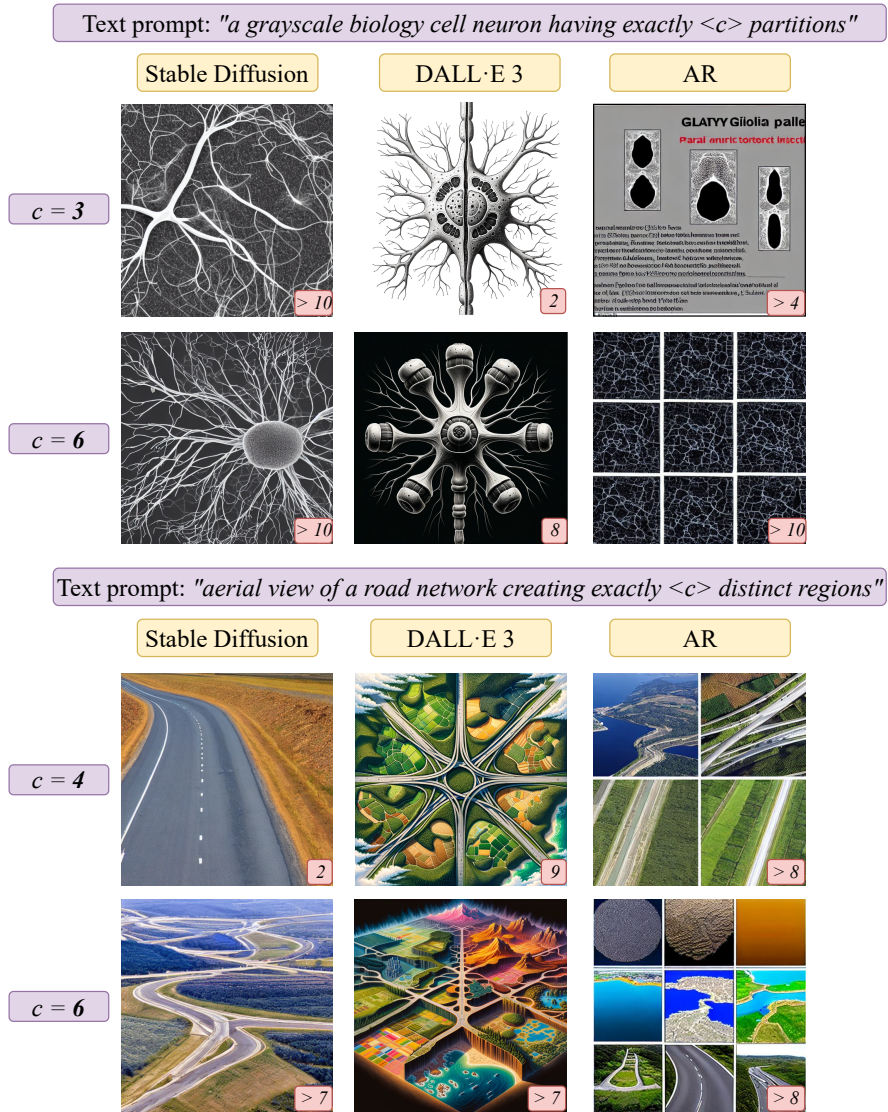

Figure 11: Qualitative results for 1-dim topological constraint. Stable Diffusion, DALL-E 3 and AR take text prompts as input (purple box). Rows 1-2: Results equivalent to CREMI. Rows 3-4: Results equivalent to Google Maps. Number of holes within each image is noted in its bottom-right inset.

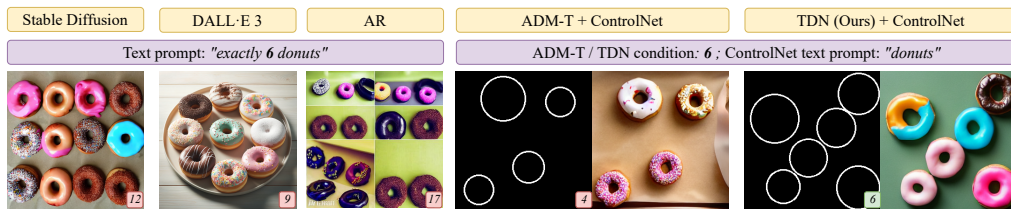

Figure 12: Results on standalone holes (holes not relative to the image frame/boundary). Number of donuts within each mask/image is noted in its bottom-right inset.

Table 7: Ablation study on Encoding Network for TDN

| Dataset           | Encoding | Accuracy $\uparrow$                   | Precision $\uparrow$                  | F1 $\uparrow$                         |
|-------------------|----------|---------------------------------------|---------------------------------------|---------------------------------------|
| Shapes            | LL       | <b>0.9478 <math>\pm</math> 0.0420</b> | <b>0.9499 <math>\pm</math> 0.0492</b> | <b>0.9488 <math>\pm</math> 0.0370</b> |
|                   | PE       | 0.9011 $\pm$ 0.0730                   | 0.9132 $\pm$ 0.0683                   | 0.9033 $\pm$ 0.0385                   |
| COCO<br>(Animals) | LL       | <b>0.8557 <math>\pm</math> 0.0805</b> | <b>0.8670 <math>\pm</math> 0.0636</b> | <b>0.8613 <math>\pm</math> 0.0970</b> |
|                   | PE       | 0.8395 $\pm$ 0.0952                   | 0.8436 $\pm$ 0.1152                   | 0.8411 $\pm$ 0.1014                   |

## H LIMITATIONS

Presently, TDN requires at least a few samples of each constraint in the training data and is not guaranteed to extrapolate to unseen constraints. This limitation stems from the broader challenges associated with state-of-the-art diffusion models, which require a large amount of training data. Exploring the numeric relationships between the different constraints, instead of treating them independently, has the potential to generalize to unseen constraints.

## I DETAILS ON PERSISTENT HOMOLOGY COMPUTATION

We expand on Sec. 3.2 regarding the persistent homology and persistence diagram (PD) computation. As mentioned in the implementation details (Appendix C), we use the Cubical Ripser library Kaji et al. (2020) for the homology computation. Their manuscript has details about the optimized algorithms they implement for the computation. Here, we provide a summarized version of the details.

Consider a 2D image  $I \in \mathbb{R}^2$ . We consider the 0-dim case in which we track the birth and death of connected components (CC). As we construct a super-level filtration  $\mathcal{S}$ , we start thresholding an image  $I$  starting from the maximum value to the minimum value. For computational purposes, we do not need to consider all threshold values  $u \in \mathbb{R}$ , rather, since the image has size  $H \times W$ , the maximum number of unique values in the image is  $H * W$ . Hence we need to consider atmost  $H * W$  values of threshold  $u$  to determine the birth and death times of all the CC in the image.

First, preprocessing is done to store all the intensity values in  $I$  along with their  $(x, y)$  location in decreasing order in a sorted data structure. This allows for faster identification of the next threshold value as well as the pixels that get newly included in the super-level set. Second, we utilize the standard Union-Find data structure Tarjan (1975), which maintains a collection of disjoint sets. This data structure supports the operation `FIND`  $((x, y))$ , which finds the highest-value representative of the CC containing the pixel  $(x, y)$ . It also supports the operation `UNITE`  $((x, y), (v, w))$ , which unites the CCs represented by root pixels  $(x, y)$  and  $(v, w)$  and, assuming  $I(x, y) > I(v, w)$ , making  $(x, y)$  the representative of the merged components.

At each threshold value  $u$ , we use the sorted data structure to identify which pixels are included in the set  $\mathcal{S}(u)$ . `FIND` is called on all these newly added pixels to determine if they belong to any existing CC; if not, they are considered roots of a new CC, with a new entry to the list of disjoint sets in the union-find data structure. Furthermore, this results in the creation of a dot  $(u, -\infty)$  in the persistence diagram whose birth time is  $u$ , and a default death time of  $-\infty$ . Then, `UNITE` is called for every pair of roots in the disjoint set list, to determine if any of the sets are in fact merged. Consider if sets with roots  $(x, y)$  and  $(v, w)$  are merged, with  $I(x, y) > I(v, w)$ . In that case, CC with root  $(v, w)$  has now ‘died’, and so the persistence dot whose birth time was  $I(v, w)$  in the diagram, will now have an updated death time of  $u$ . Hence,  $(I(v, w), u)$  will replace the old dot  $(I(v, w), -\infty)$  in the persistence diagram.

We show a walkthrough of this in Fig. 13. We start with an empty union-find data structure. In (a), we start with  $u = 5$ , as 5 is the maximum value in the image. We call `FIND` and update the union-find data structure with a new entry. Additionally, the persistence diagram (PD) in (e) has an entry for  $(5, -\infty)$ . This CC is denoted as  $\alpha_1$ . Next, in (b)  $u = 4$ , all the blue and red pixels are newly added to this filtration. `FIND` is called on each of them. The blue pixels indicate that they were found to be a part of an existing CC. The red pixels indicate that no parent CC was found, and hence are considered as creating new CCs. The PD includes two new dots  $\alpha_2(4, -\infty)$  and  $\alpha_3(4, -\infty)$ . Next, as intensity value 3 is not present in  $I$ , we do not need to compute  $\mathcal{S}(3)$ . The sorted data structure directly leads us to the next  $u$  value which is  $u = 2$  in (c). `FIND` is called on all the blue pixels. `UNITE` is called on all pairs of root CC nodes, resulting `True` for the fact that components  $\alpha_1$  and  $\alpha_2$  have now merged. Since the birth time of  $\alpha_1$  is larger, the component  $\alpha_2$  ‘dies’ and becomes a part of  $\alpha_1$ . Thus, the persistent dot is updated from  $\alpha_2(4, -\infty)$  to  $\alpha_2(4, 2)$  as it was born at  $u = 4$  has died at  $u = 2$ . Similarly in (d), at  $u = 1$ , `FIND` is called on all the blue pixels. Then `UNITE`  $(\alpha_1, \alpha_3)$  is called, showing that they are actually merged. Thus, the persistent dot is updated from  $\alpha_3(4, -\infty)$  to  $\alpha_3(4, 1)$  as  $\alpha_3$  was born at  $u = 4$  and has now died at  $u = 1$ . Thus, the final persistent dots we end up with are  $\alpha_1(5, -\infty)$ ,  $\alpha_2(4, 2)$ ,  $\alpha_3(4, 1)$  as shown in (e).

For 1-dimensional and higher features (e.g., loops and voids), while we do not go into details here, the Cubical Ripser library constructs a sparse coboundary matrix that encodes relationships between pixels. This matrix is reduced to upper-triangular form using column operations, optimizing the identification of the birth and death of cycles. Each non-zero pivot in the reduced matrix corresponds to a topological feature. This computational framework ensures the efficient generation of persistence diagrams, leveraging union-find for 0-dim and matrix operations for higher dimensions. More details are available in the Cubical Ripser Kaji et al. (2020) paper.

1134  
 1135  
 1136  
 1137  
 1138  
 1139  
 1140  
 1141  
 1142  
 1143  
 1144  
 1145  
 1146  
 1147  
 1148  
 1149  
 1150  
 1151  
 1152  
 1153  
 1154  
 1155  
 1156  
 1157  
 1158  
 1159  
 1160  
 1161  
 1162  
 1163  
 1164  
 1165  
 1166  
 1167  
 1168  
 1169  
 1170  
 1171  
 1172  
 1173  
 1174  
 1175  
 1176  
 1177  
 1178  
 1179  
 1180  
 1181  
 1182  
 1183  
 1184  
 1185  
 1186  
 1187

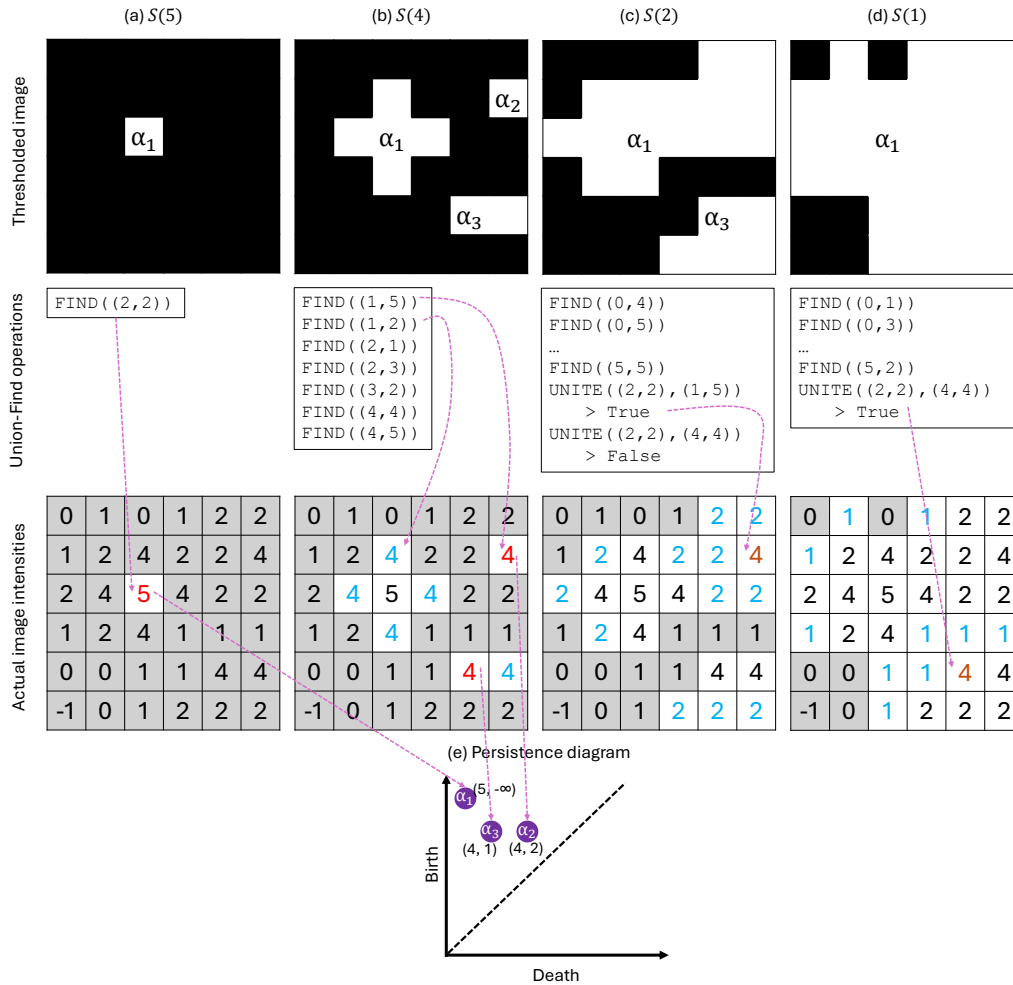

Figure 13: Figure inspired from Kaji et al. (2020). The figure shows a sample 2D image, thresholded at different values. (a)-(d) shows the sequence of super-level sets  $S(u)$ , which is nothing but thresholding the image at the value  $u$ . It shows how different connected components (CC) are created or destroyed as  $u$  changes. White-background cells indicate pixels included in the set  $S(u)$ . Red indicates root pixels causing the birth of a CC. Blue indicates pixels that are newly added to the set  $S(u)$  but are absorbed in existing CCs. Brown indicates root pixels whose CC has died, having merged with another CC whose root had a higher birth time. (e) shows the corresponding 0-dim persistence diagram.

## J QUALITY OF GENERATED MASKS

We provide FID scores across all the datasets in Tab. 8. Since our method TDN focuses on generating masks, we report the FID of the mask [FID (Mask)] and the FID of the images [FID (Image)] generated by ControlNet Zhang et al. (2023) when using these masks as condition.

Our analysis shows that the quality of the masks generated by TDN closely resembles the true masks, that is, the ground truth (GT) masks annotated by humans, as evidenced by the consistently low FID (Mask) scores across all datasets. Additionally, to evaluate the impact on final image quality, we compare the FID (Image) metric between two scenarios: ControlNet using GT masks (ControlNet + GT) versus ControlNet using TDN-generated masks. The results demonstrate comparable FID scores, indicating that using TDN-generated masks as conditioning does not degrade the image quality. In other words, TDN-generated masks are as good as GT masks for generating real images.

Results from Tab. 1 and Tab. 8 highlight that TDN achieves improved topological control while maintaining the overall visual quality of the generated images.

Table 8: **Comparison of FID (Mask) and FID (Image) against baselines across all datasets.** For Shapes and Google Maps datasets, we cannot report FID (Image) as there is no ground truth image dataset to compare to. For COCO and CREMI, we report FID (Image) against the respective dataset images. ControlNet + GT indicates that ControlNet is using the GT masks as the condition. ControlNet + FT indicates that it has been fine-tuned on the CREMI dataset to generate similarly textured images. **Bold** denotes the best results, while *italics* denotes the second best. Note that ControlNet + GT has been included as the upper bound performance; realistically, it cannot be used during inference as the GT masks are not available

| Dataset               | Method               | FID (Mask) ↓ | FID (Image) ↓ |
|-----------------------|----------------------|--------------|---------------|
| <b>Shapes</b>         | ADM-T                | 0.092        | -             |
|                       | TDN (Ours)           | <b>0.068</b> | -             |
| <b>COCO (Animals)</b> | Stable Diffusion     | -            | 29.41         |
|                       | DALL-E 3             | -            | <b>17.49</b>  |
|                       | AR                   | -            | 35.05         |
|                       | ADM-T                | 0.267        | 21.72         |
|                       | TDN (Ours)           | <b>0.222</b> | 21.28         |
|                       | ControlNet + GT      | -            | 20.94         |
| <b>Google Maps</b>    | ADM-T                | 0.198        | -             |
|                       | TDN (Ours)           | <b>0.156</b> | -             |
| <b>CREMI</b>          | Stable Diffusion     | -            | 48.18         |
|                       | DALL-E 3             | -            | 54.72         |
|                       | AR                   | -            | 69.86         |
|                       | ADM-T                | 0.518        | 3.322         |
|                       | TDN (Ours)           | <b>0.467</b> | <b>3.286</b>  |
|                       | ControlNet + GT + FT | -            | 3.126         |

## K USING 0-DIM AND 1-DIM SIMULTANEOUS TOPOLOGICAL CONSTRAINTS

In our work, we focused on using either 0-dim (number of objects) or 1-dim (number of holes) constraints individually, depending on the property of the dataset. In this section, we conduct experiments on synthetic data using both 0-dim and 1-dim constraints simultaneously. The constraint is of the form  $(a, b)$  where  $a$  denotes 0-dim while  $b$  denotes 1-dim. Both are first separately encoded and then added together to be fed as a condition. Sample masks generated by TDN along with ControlNet-rendered images are shown in Fig. 14. We report quantitative results in Tab. 9.

We find that TDN is capable of handling these joint constraints. While the performance is slightly lower compared to using each constraint individually, TDN still significantly outperforms ADM-T across all metrics. This shows that persistent homology (PH) can enhance the performance of the base diffusion model, even under multi-constraint scenarios. This finding opens up interesting possibilities for future work in handling even richer combinations of topological constraints.

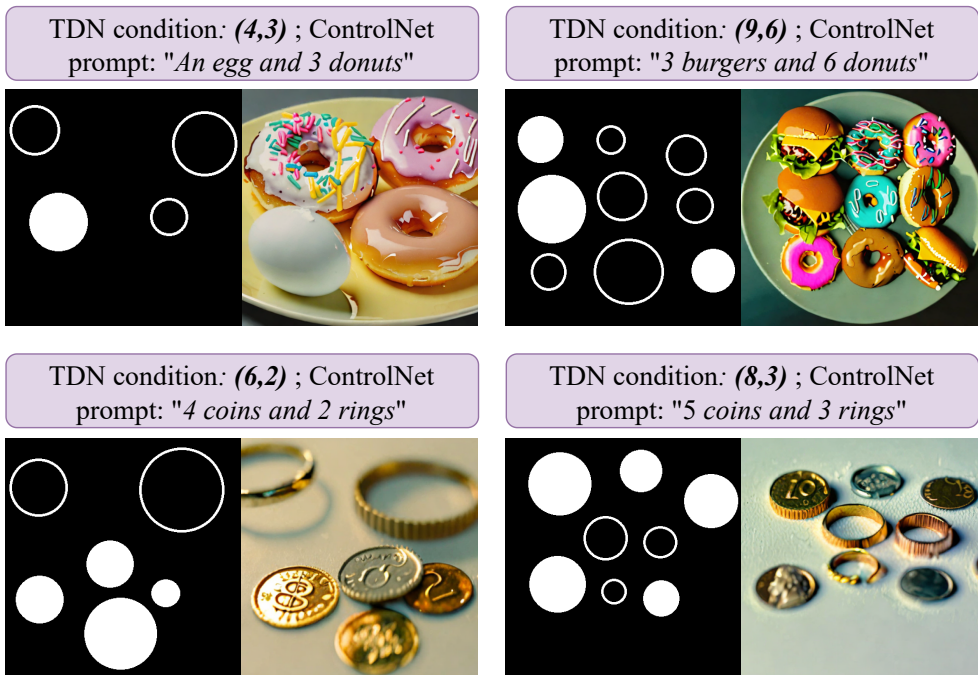

Figure 14: Masks generated by TDN using both 0-dim and 1-dim topological constraints simultaneously. Condition  $(a, b)$  denotes  $a$  for 0-dim (#objects) and  $b$  for 1-dim (#holes). Images are generated via ControlNet by using mask as a condition.

Table 9: Quantitative performance of using both 0-dim and 1-dim topological constraints simultaneously. The FID (Mask) is reported once for each method. Best results are highlighted in **bold**

| TopoDim | Method     | Accuracy $\uparrow$                   | Precision $\uparrow$                  | F1 $\uparrow$                         | FID (Mask) $\downarrow$ |
|---------|------------|---------------------------------------|---------------------------------------|---------------------------------------|-------------------------|
| 0-dim   | ADM-T      | 0.7383 $\pm$ 0.1305                   | 0.7997 $\pm$ 0.1268                   | 0.7677 $\pm$ 0.1229                   | 0.1279                  |
|         | TDN (Ours) | <b>0.9183 <math>\pm</math> 0.0731</b> | <b>0.9338 <math>\pm</math> 0.0993</b> | <b>0.9261 <math>\pm</math> 0.0906</b> | <b>0.0982</b>           |
| 1-dim   | ADM-T      | 0.7616 $\pm$ 0.0905                   | 0.7892 $\pm$ 0.1129                   | 0.7752 $\pm$ 0.1082                   | -                       |
|         | TDN (Ours) | <b>0.9233 <math>\pm</math> 0.0705</b> | <b>0.9492 <math>\pm</math> 0.0913</b> | <b>0.9360 <math>\pm</math> 0.0720</b> | -                       |

1296  
1297  
1298  
1299  
1300  
1301  
1302  
1303  
1304  
1305  
1306  
1307  
1308  
1309  
1310  
1311  
1312  
1313  
1314  
1315  
1316  
1317  
1318  
1319  
1320  
1321  
1322  
1323  
1324  
1325  
1326  
1327  
1328  
1329  
1330  
1331  
1332  
1333  
1334  
1335  
1336  
1337  
1338  
1339  
1340  
1341  
1342  
1343  
1344  
1345  
1346  
1347  
1348  
1349

### K.1 GENERATING SPECIFIC TOPOLOGY LIKE DOUBLE ANNULUS

As mentioned above, we represent the joint constraints as pairs  $(a, b)$ , where  $a$  specifies the number of connected components (0-dim) and  $b$  specifies the number of holes (1-dim). A double annulus consists of concentric circles, with  $(a, b) = (2, 2)$ . Our loss, based on homology, cannot distinguish whether two loops are positioned concentric or not, however, it can generate structures that are homotopy equivalent to the double annulus. As shown in Fig. 15, by sampling for the  $(2, 2)$  condition, TDN can generate nested circles (visually the closest constraint to a double annulus) and other homotopy equivalent structures. This experiment demonstrates that our method can handle complex topological specifications through the combination of constraints, though geometric relationships (like equidistance and concentricity) remain an interesting direction for future work.

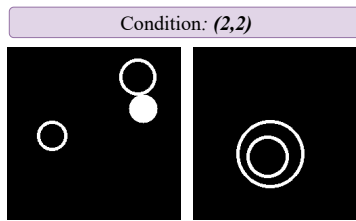

Figure 15: Sample images generated by TDN when using both 0-dim and 1-dim topological constraints simultaneously. With constraints  $(a, b) = (2, 2)$ , we can generate nested circles which are the closest to achieving a double annulus (two concentric circles) using our method.

## L COMPARISON AGAINST CVAE

In this section, we justify the motivation behind using diffusion models instead of other generative models like Conditional Variational Autoencoders (CVAE) Sohn et al. (2015). We conduct experiments using CVAE as the generative model for the same task of generating masks. Although we trained on multiple image resolutions, CVAE performed poorly on larger image sizes. Hence we report results on  $64 \times 64$  images, using a latent embedding dimension of 128. We show results in Tab. 10 and Fig. 16 for both standard CVAE and a version incorporating our proposed loss  $\mathcal{L}_{top}$ .

Our experimental results show significant limitations of the CVAE approach. From Fig. 16, we see that the quality of the masks generated by CVAE, with and without  $\mathcal{L}_{top}$ , is severely degraded. From Tab. 10, it has a significantly higher FID compared to our TDN masks, indicating a lower resemblance to the true masks. Additionally, CVAE also struggles to preserve topological constraints, as evidenced by the low performance on evaluation metrics like Accuracy and F1. While CVAE +  $\mathcal{L}_{top}$  slightly improves performance, it remains far weaker than diffusion models. Specifically, in the 0-dim, CVAE generates fragmented objects and fails to preserve their overall shapes. In 1-dim, it fails to generate connected structures. Although mask images seem easy because they are binary images, they are in fact a challenge to generate. This is because of the difference in the number of objects, their varied shapes and sizes, and unconstrained spatial locations (eg: not fixed to the center of the image). Similarly, the diverse orientation and connection patterns make the 1-dim datasets challenging. Such complexities make it difficult for the CVAE to generalize to these datasets.

Using diffusion models is critical to the success of TDN. First, the base diffusion model ADM-T effectively captures spatial arrangements and object shapes (in 0-dim), and connectivity patterns in 1-dim. However, it struggles with the number of objects/holes. This is where our persistent homology loss brings big improvements. Preserving the number of structures requires heavy global reasoning and detail. In contrast, CVAE’s bottleneck layer compresses information, losing significant information in the image space. This limits their ability to preserve object shape and enforce strict topological constraints. The significant gain of our loss in diffusion models is owing to the gradual denoising steps, as well as intact image resolution. These experiments highlight the necessity of diffusion models, making them critical to the success of our method in topological control.

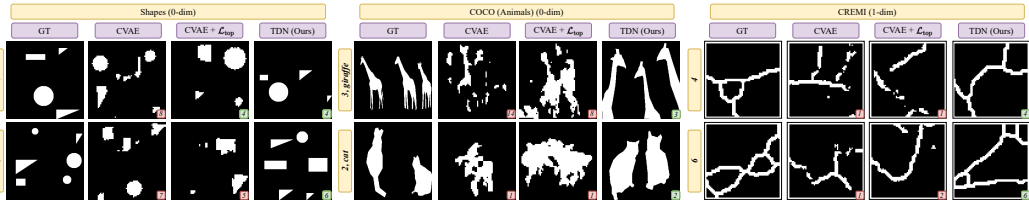

Figure 16: Qualitative comparison of using CVAE and diffusion models as the generative model. Ground truth (GT) denotes the true masks used to train the models

Table 10: Quantitative comparison of using CVAE and diffusion models as the generative model. We include ADM-T and TDN results from Tab. 1 for convenience. Best results are in **bold**

| Dataset (TopoDim) | Method                     | Accuracy $\uparrow$                   | Precision $\uparrow$                  | F1 $\uparrow$                         | FID (Mask) $\downarrow$ |
|-------------------|----------------------------|---------------------------------------|---------------------------------------|---------------------------------------|-------------------------|
| Shapes (0-dim)    | CVAE Sohn et al. (2015)    | 0.3133 $\pm$ 0.1321                   | 0.3235 $\pm$ 0.1984                   | 0.3078 $\pm$ 0.1443                   | 2.231                   |
|                   | CVAE + $\mathcal{L}_{top}$ | 0.3816 $\pm$ 0.0919                   | 0.3444 $\pm$ 0.1276                   | 0.3220 $\pm$ 0.1365                   | 1.981                   |
|                   | ADM-T                      | 0.7500 $\pm$ 0.1889                   | 0.7809 $\pm$ 0.1582                   | 0.7651 $\pm$ 0.1210                   | 0.092                   |
|                   | TDN (Ours)                 | <b>0.9478 <math>\pm</math> 0.0420</b> | <b>0.9499 <math>\pm</math> 0.0492</b> | <b>0.9488 <math>\pm</math> 0.0370</b> | <b>0.068</b>            |
| COCO (0-dim)      | CVAE Sohn et al. (2015)    | 0.2442 $\pm$ 0.0410                   | 0.2696 $\pm$ 0.0285                   | 0.2562 $\pm$ 0.0318                   | 4.208                   |
|                   | CVAE + $\mathcal{L}_{top}$ | 0.3094 $\pm$ 0.0967                   | 0.3342 $\pm$ 0.0729                   | 0.3213 $\pm$ 0.1165                   | 4.083                   |
|                   | ADM-T                      | 0.6685 $\pm$ 0.1485                   | 0.6917 $\pm$ 0.1079                   | 0.6799 $\pm$ 0.1931                   | 0.267                   |
|                   | TDN (Ours)                 | <b>0.8557 <math>\pm</math> 0.0805</b> | <b>0.8670 <math>\pm</math> 0.0636</b> | <b>0.8613 <math>\pm</math> 0.0970</b> | <b>0.222</b>            |
| CREMI (1-dim)     | CVAE Sohn et al. (2015)    | 0.2785 $\pm$ 0.4296                   | 0.2267 $\pm$ 0.1156                   | 0.2499 $\pm$ 0.1391                   | 5.971                   |
|                   | CVAE + $\mathcal{L}_{top}$ | 0.3267 $\pm$ 0.2834                   | 0.3091 $\pm$ 0.1079                   | 0.3176 $\pm$ 0.1447                   | 5.751                   |
|                   | ADM-T                      | 0.5357 $\pm$ 0.1879                   | 0.4777 $\pm$ 0.1797                   | 0.4881 $\pm$ 0.1571                   | 0.518                   |
|                   | TDN (Ours)                 | <b>0.7785 <math>\pm</math> 0.1901</b> | <b>0.8142 <math>\pm</math> 0.1925</b> | <b>0.7959 <math>\pm</math> 0.1659</b> | <b>0.467</b>            |



## M COMPARISON AGAINST BASIC MASKS

To justify the importance of our approach, we conduct experiments using simple shapes (circles and squares) as conditioning masks for ControlNet Zhang et al. (2023). Quantitative results are shown in Tab. 11, and qualitative examples are provided in Fig. 17.

Our experiments reveal several limitations when using simplified shapes as conditioning masks, as they fail to provide sufficient spatial and structural guidance. This setup is comparable to AR Phung et al. (2024) (shown in Tab. 1 and Fig. 6 of the main paper), which uses rectangular bounding boxes with an additional attention step. From our observations, we detect multiple failure modes. First, from Fig. 17, we see that such conditions tend to introduce visual artifacts in the generated images. The images are often fragmented, with objects isolated within assigned areas, leading to a divided and visually disjointed image. Second, the basic shapes also fail to constrain the number of objects within them, often resulting in 0 objects or multiple objects per shape (see the ‘cats’ row). Finally, for large animals like zebras, ControlNet struggles to complete the image beyond the boundary of the shape—while the zebra texture is present within the shape, the overall image is not as desired. Similarly, for even larger animals like giraffes, the discrepancy between the basic shape and the natural object proportions leads to incomplete or distorted generations.

In contrast, the masks generated by TDN provide tighter spatial and structural control by offering sufficient detail to guide the network effectively. This results in correct object counts and better visual quality, as evidenced by superior FID scores and count metrics. TDN’s masks strike a balance between oversimplification and unnecessary complexity, as generative models are powerful enough to fill in finer textural details.

Our results highlight that relying solely on a text prompt and simplified masks is insufficient for the model to generate visually coherent images. Instead, meaningful masks like those generated by TDN are essential for ensuring reliable control over cardinality and topology in generative models.

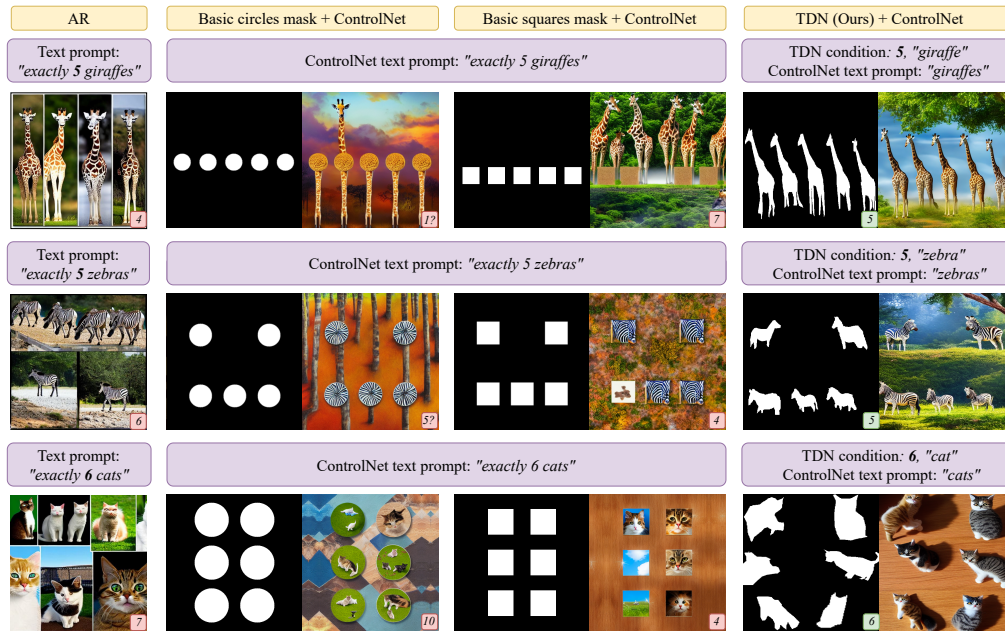

Figure 17: Qualitative comparison of using different conditioning types, particularly masks containing basic shapes like circles/squares to guide cardinality. ControlNet uses the SD1.5 backbone (Lvmin Zhang).

Table 11: Quantitative comparison of using different conditioning types for the COCO dataset. We include AR (Phung et al., 2024) and TDN results from Tab. 1 for convenience. Best results in **bold**

| Method / Mask condition type    | Accuracy $\uparrow$                   | Precision $\uparrow$                  | F1 $\uparrow$                         | FID (Image) $\downarrow$ |
|---------------------------------|---------------------------------------|---------------------------------------|---------------------------------------|--------------------------|
| Basic circles mask + ControlNet | 0.2972 $\pm$ 0.3592                   | 0.3194 $\pm$ 0.3046                   | 0.3079 $\pm$ 0.2208                   | 49.47                    |
| Basic squares mask + ControlNet | 0.3123 $\pm$ 0.2114                   | 0.3459 $\pm$ 0.2209                   | 0.3282 $\pm$ 0.2618                   | 47.16                    |
| AR (Bounding box w/ attention)  | 0.6379 $\pm$ 0.2062                   | 0.7360 $\pm$ 0.1658                   | 0.6611 $\pm$ 0.1851                   | 35.05                    |
| TDN (Ours)                      | <b>0.8557 <math>\pm</math> 0.0805</b> | <b>0.8670 <math>\pm</math> 0.0636</b> | <b>0.8613 <math>\pm</math> 0.0970</b> | <b>21.28</b>             |

### M.1 USING SDXL-TURBO BACKBONE FOR CONTROLNET

The ControlNet results generated in this paper have used the SD1.5 backbone (Lvmin Zhang). In this sub-section, we generate ControlNet results using the newer SDXL-Turbo backbone<sup>8</sup> (Sauer et al., 2025). The results are in Fig. 18, Fig. 19, and Fig. 20.

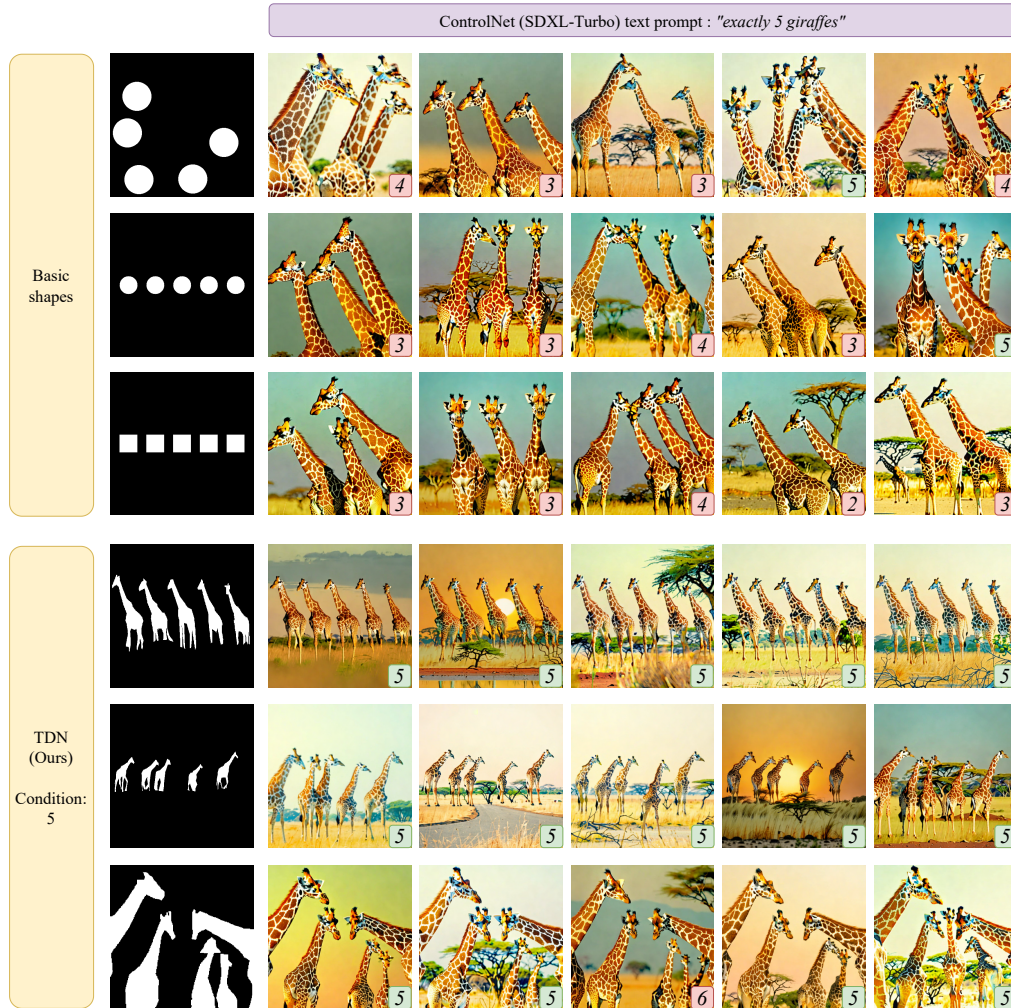

Figure 18: Generating exactly 5 giraffes. Qualitative comparison of using different conditioning types, such as masks containing basic shapes like circles/squares to guide cardinality. ControlNet uses the SDXL-Turbo backbone (Sauer et al., 2025).

<sup>8</sup><https://huggingface.co/stabilityai/sd-xl-turbo>

1512  
 1513  
 1514  
 1515  
 1516  
 1517  
 1518  
 1519  
 1520  
 1521  
 1522  
 1523  
 1524  
 1525  
 1526  
 1527  
 1528  
 1529  
 1530  
 1531  
 1532  
 1533  
 1534  
 1535  
 1536  
 1537  
 1538  
 1539  
 1540  
 1541  
 1542  
 1543  
 1544  
 1545  
 1546  
 1547  
 1548  
 1549  
 1550  
 1551  
 1552  
 1553  
 1554  
 1555  
 1556  
 1557  
 1558  
 1559  
 1560  
 1561  
 1562  
 1563  
 1564  
 1565

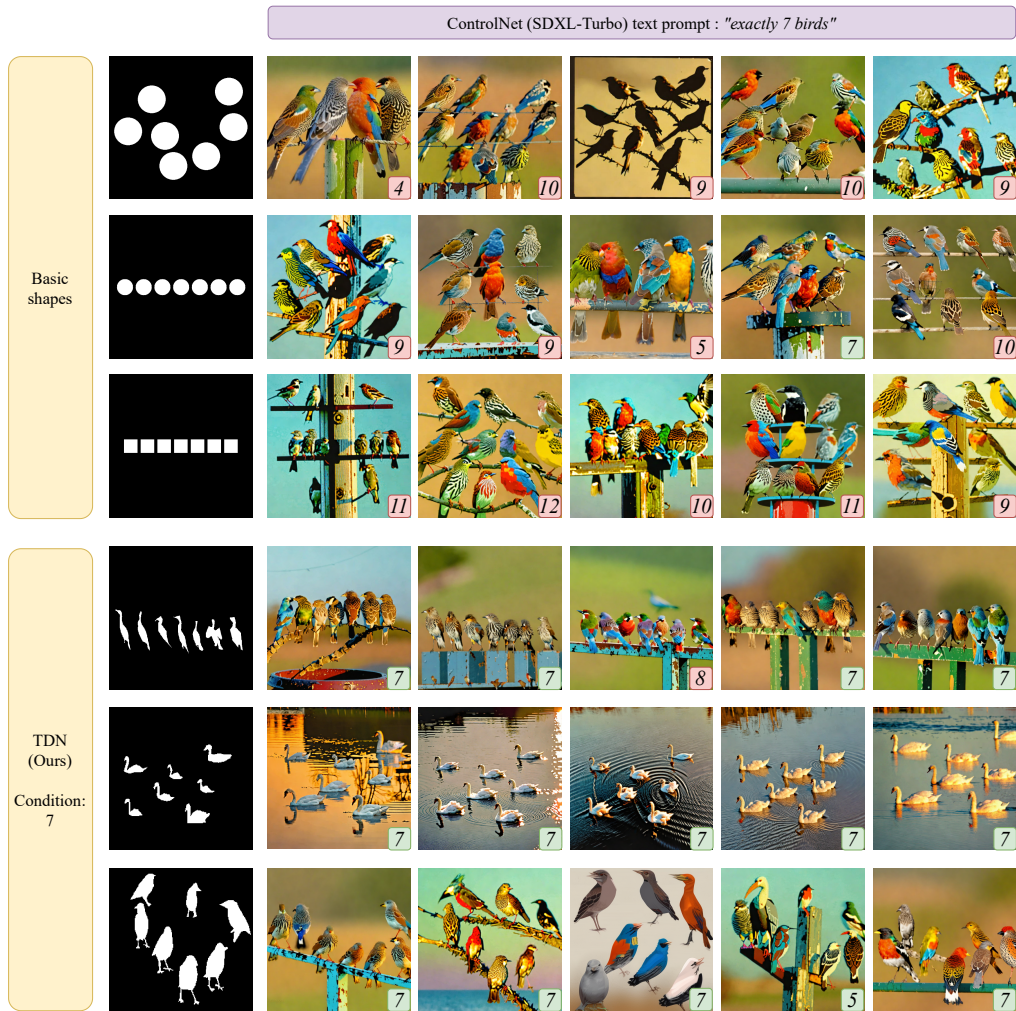

Figure 19: Generating exactly 7 birds. Qualitative comparison of using different conditioning types, such as masks containing basic shapes like circles/squares to guide cardinality. ControlNet uses the SDXL-Turbo backbone (Sauer et al., 2025).

1566  
 1567  
 1568  
 1569  
 1570  
 1571  
 1572  
 1573  
 1574  
 1575  
 1576  
 1577  
 1578  
 1579  
 1580  
 1581  
 1582  
 1583  
 1584  
 1585  
 1586  
 1587  
 1588  
 1589  
 1590  
 1591  
 1592  
 1593  
 1594  
 1595  
 1596  
 1597  
 1598  
 1599  
 1600  
 1601  
 1602  
 1603  
 1604  
 1605  
 1606  
 1607  
 1608  
 1609  
 1610  
 1611  
 1612  
 1613  
 1614  
 1615  
 1616  
 1617  
 1618  
 1619

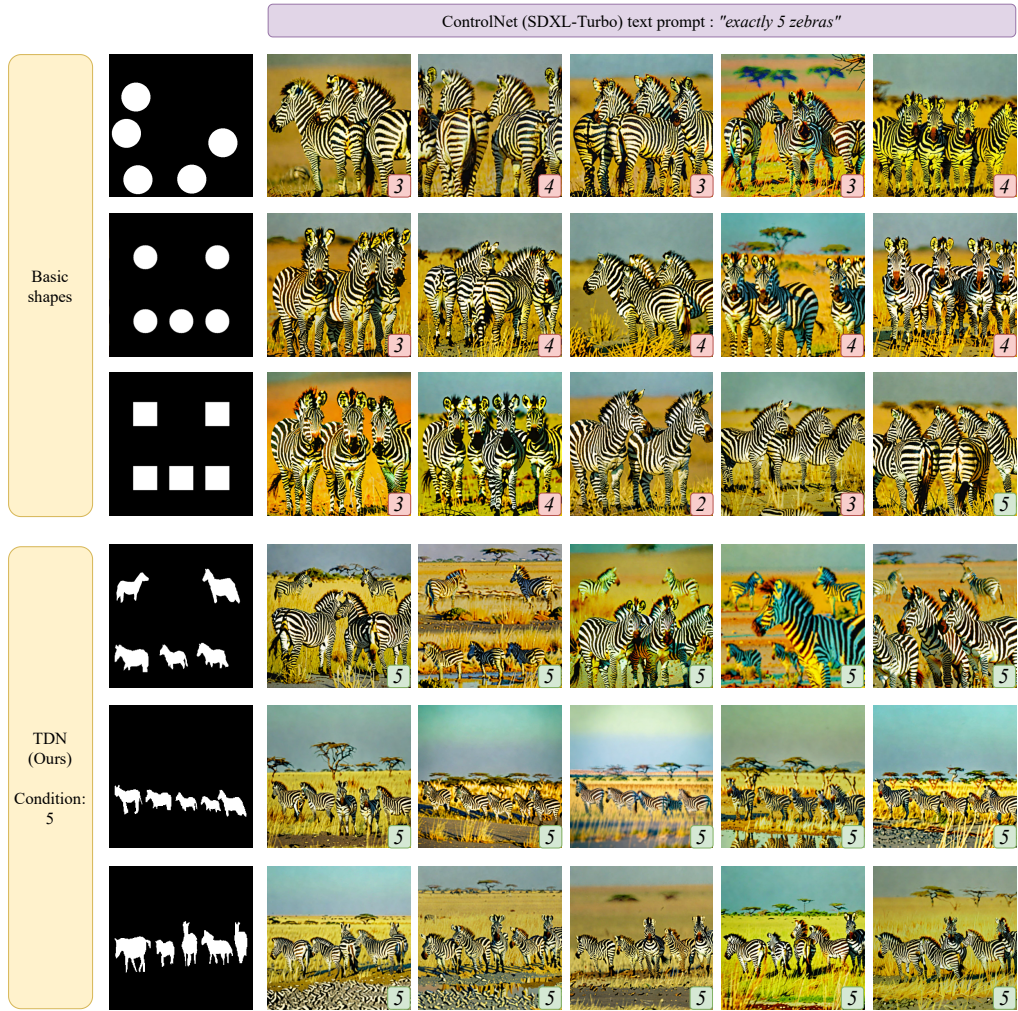

Figure 20: Generating exactly 5 zebras. Qualitative comparison of using different conditioning types, such as masks containing basic shapes like circles/squares to guide cardinality. ControlNet uses the SDXL-Turbo backbone (Sauer et al., 2025).

1620 N FUTURE WORK  
1621

1622 Our proposed TDN currently uses persistent homology to control the number of objects (in 0-dim)  
1623 and the number of holes (in 1-dim). However, persistent homology can theoretically be extended to  
1624 higher dimensions, as persistence diagrams can capture topological features in arbitrary dimensions.  
1625 For future work, we are looking into graph network generations, as well as 3D applications, where  
1626 we can control not just connected components (0-dim) and holes (1-dim), but also voids (2-dim).  
1627 3D point clouds and volumetric medical imaging data are important applications where maintaining  
1628 topology is crucial in generating realistic synthetic data.  
1629

1630  
1631  
1632  
1633  
1634  
1635  
1636  
1637  
1638  
1639  
1640  
1641  
1642  
1643  
1644  
1645  
1646  
1647  
1648  
1649  
1650  
1651  
1652  
1653  
1654  
1655  
1656  
1657  
1658  
1659  
1660  
1661  
1662  
1663  
1664  
1665  
1666  
1667  
1668  
1669  
1670  
1671  
1672  
1673
